# Supplementary material
Source: publisher figshare collection journal article supplement (https://acs.figshare.com/ndownloader/files/25029582)
Supplement: Supplementary file 1 [file 25029582]

## **Supporting information**

### **Label-free electrochemical Immunosensor Based on One-Step Electrochemical Deposition of AuNP-RGO nanocomposites for Detection of Endometriosis marker CA 125**

Arumugam Sangili,<sup>†,‡</sup> Thangapandi Kalyani,<sup>‡</sup> Shen-Ming Chen,<sup>\*,†</sup> Amalesh Nanda,<sup>‡</sup> Saikat Kumar Jana,<sup>\*,‡</sup>

<sup>†</sup>Department of Chemical Engineering and Biotechnology, National Taipei University of Technology, Taipei 106, Taiwan, ROC.

<sup>‡</sup>Department of Biotechnology, National Institute of Technology, Papum Pare-791112, Arunachal Pradesh, India

#### **Corresponding Authors**

E-mail: [smchen78@ms15.hinet.net](mailto:smchen78@ms15.hinet.net) (S.-M. Chen); Fax: +886-2-27025238

E-mail: [saikatmicro4@gmail.com](mailto:saikatmicro4@gmail.com) (S. K. Jana); Tel; +91 9485230608

Number of Tables: 1

Number of figures: 7

## Table of content

| Entry            | Table of Contents                                                                                                                                                                                                                                                                                                                                                                                                                             | Page No |
|------------------|-----------------------------------------------------------------------------------------------------------------------------------------------------------------------------------------------------------------------------------------------------------------------------------------------------------------------------------------------------------------------------------------------------------------------------------------------|---------|
| 1                | Experimental section                                                                                                                                                                                                                                                                                                                                                                                                                          | S3      |
| <b>Figure S1</b> | 10, 30, and 50 cycles electrochemical deposition of Au NP/RGO.                                                                                                                                                                                                                                                                                                                                                                                | S4      |
| <b>Figure S2</b> | (a) SEM-EDX analysis (insert; weight percentages), (b-e) mapping analysis of Au, C, and O elements, respectively.                                                                                                                                                                                                                                                                                                                             | S5      |
| <b>Figure S3</b> | CV response of different cycles 10, 30, and 50 cycles of 50-Au NP/RGO (insert: extended view). All experiments was examined by 0.1 M KCl/5 mM $[\text{Fe}(\text{CN})_6]^{3-/4-}$ (pH 7.4, 0.1 M PBS),                                                                                                                                                                                                                                         | S6      |
| <b>Figure S4</b> | (a) Effect of incubation time, (b) Effect of the immobilization Ab concentration, (c) effect of BSA incubation time in the presence of 10 U mL <sup>-1</sup> , (d) Incubation temperature, (e) effect of pH, and (f) incubation time of Ag. Inset corresponding SWV curve. All immunosensor signals respond to 10 U mL <sup>-1</sup> CA125 in 0.05 MPBS containing 5 mm $[\text{Fe}(\text{CN})_6]^{3-/4-}$ /0.1 M KCl. Error bar = RSD (n=3). | S7      |
| <b>Figure S5</b> | <b>Figure S5.</b> (a) Effect of interference, (b) effect of repeatability, (c) effect of storage stability, signal response of the immunosensor to 10 U mL <sup>-1</sup> CA125 in 0.1 PBS M (pH 7.4) solution containing in 5 mm $[\text{Fe}(\text{CN})_6]^{3-/4-}$ /0.1 M KCl. Error bar = RSD (n=3).                                                                                                                                        | S8      |
| <b>Figure S6</b> | <b>Figure S6.</b> (a) Effect of regeneration, signal response of the immunosensor to 10 U mL <sup>-1</sup> CA125 in 0.1 M PBS (pH 7.4) solution containing in 5 mm $[\text{Fe}(\text{CN})_6]^{3-/4-}$ /0.1 M KCl. Error bar = RSD (n=3)                                                                                                                                                                                                       | S9      |
| <b>Figure S7</b> | <b>Figure S7.</b> Standard inhibition curve for the indirect ELISA. Serum sample was 2-fold dilution                                                                                                                                                                                                                                                                                                                                          | S10     |
|                  | <b>Reference</b>                                                                                                                                                                                                                                                                                                                                                                                                                              | S11     |

# 1. EXPERIMENTAL SECTION

## 1.1. Characterization

Morphology and elemental analysis of prepared composites were studied by Field Emission-Scanning Electron Microscopy (FE-SEM, JEOL JSM-7610F). All samples were deposited onto the indium tin oxide (ITO) glass with the optimal procedure. The crystalline structure of composite was studied by X-ray diffraction (XRD) using PANalytical X'Pert PRO diffractometer with the Cu K $\alpha$ 1 radiation ( $\lambda = 1.540598$  nm). Raman spectra were monitored Dongwoo 500i model spectrometer analyzed by as-prepared composite (acquired at a resolution of  $1.0\text{ cm}^{-1}$ , acquisition time of 30 s). X-ray Photoelectron Spectroscopy (XPS) study were analyzed with an ESCA chemical analysis electron spectrometer (JEOL Ltd., Japan, JPS-9030). SP150 Bio-Logic Science Instrument (electrochemical workstation, France) was used for electrochemical analysis. The electrochemical cell involved in a three-electrode system. The platinum (Pt) wire as a counter electrode, glassy carbon electrode (GCE) was a working electrode, and saturated Ag/AgCl electrode, and Cyclic voltammetry (CV), electrochemical impedance spectroscopy (EIS), and square wave voltammetry (SWV) techniques were performed in the presence of 0.1 M KCl/5 mM  $[\text{Fe}(\text{CN})_6]^{3-/4-}$  (pH 7.4, 0.1 PBS) mixture as a redox probe.

**1.2. Graphene oxide synthesis.** Graphene oxide (GO) prepared by modified Hummer's method.<sup>S1</sup> Typically, 2.0 g GR, 2.0 g  $\text{NaNO}_3$ , and 50 mL concentrated  $\text{H}_2\text{SO}_4$  were successively added into a beaker and stirred for 30 min in an ice bath. Then, 6.0 g  $\text{KMnO}_4$  was added into the above mixture was stirred for 5h. The reaction mixture was stirred for 30 min at  $35^\circ\text{C}$  after which is diluted with 60 mL of MP- $\text{H}_2\text{O}$  is added and stirred below  $100^\circ\text{C}$  and kept for 30 min. Then the reaction mixture terminated by 300 mL of MP- $\text{H}_2\text{O}$  and 20 mL of  $\text{H}_2\text{O}_2$ . After vigorous stirring for 60 min, the final product was centrifuged by repeated washing with MP- $\text{H}_2\text{O}$  until the pH 7.0.

**Figure caption**

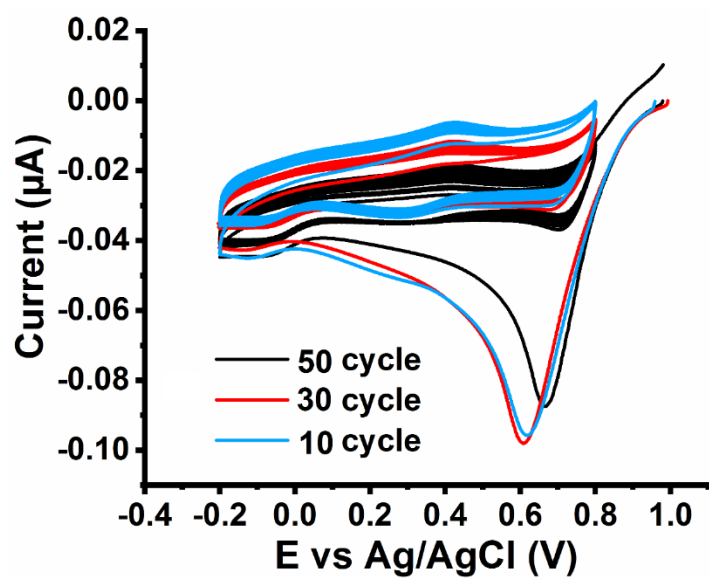

**Figure S1.** 10, 30, and 50 cycles electrochemical deposition of AuNP/RGO.

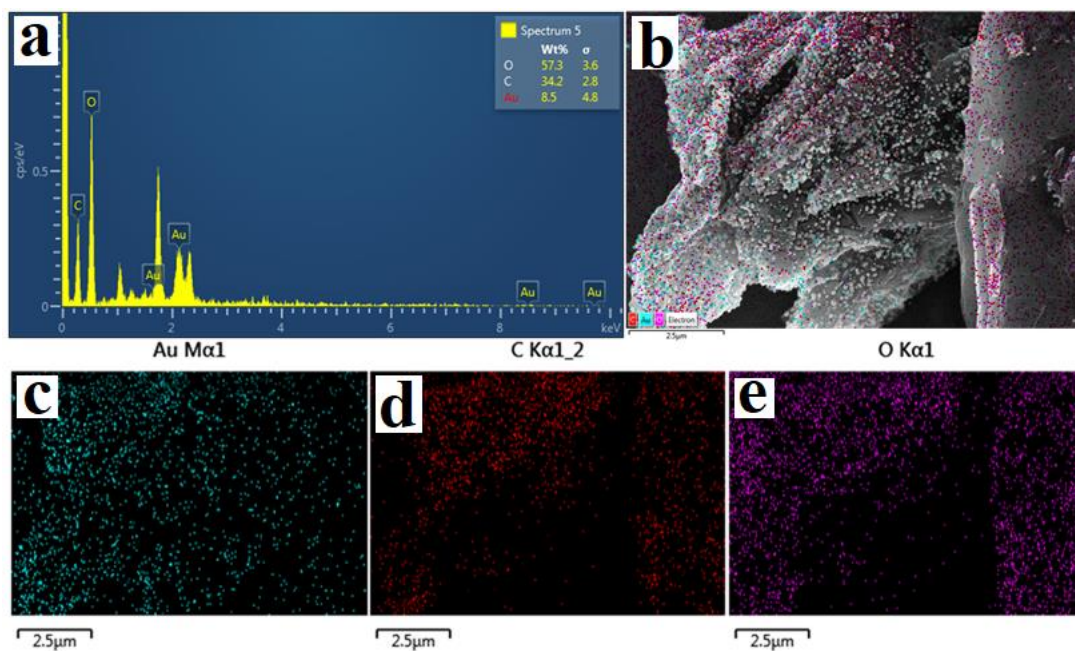

**Figure S2.** (a) SEM-EDX analysis (insert; weight percentages), (b-e) mapping analysis of Au, C, and O elements, respectively.

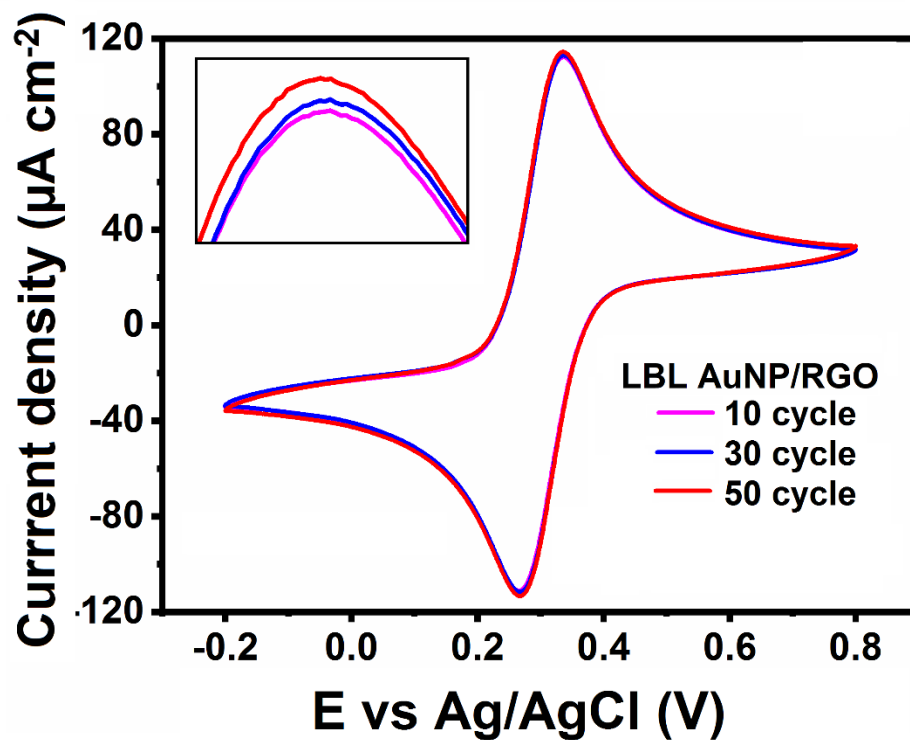

**Figure S3.** CV response of different cycles 10, 30, and 50 cycles of 50-AuNP/RGO (insert: extended view). All experiment was examined by 0.1 M KCl/5 mM  $[\text{Fe}(\text{CN})_6]^{3-/4-}$  (pH 7.4, 0.1 M PBS).

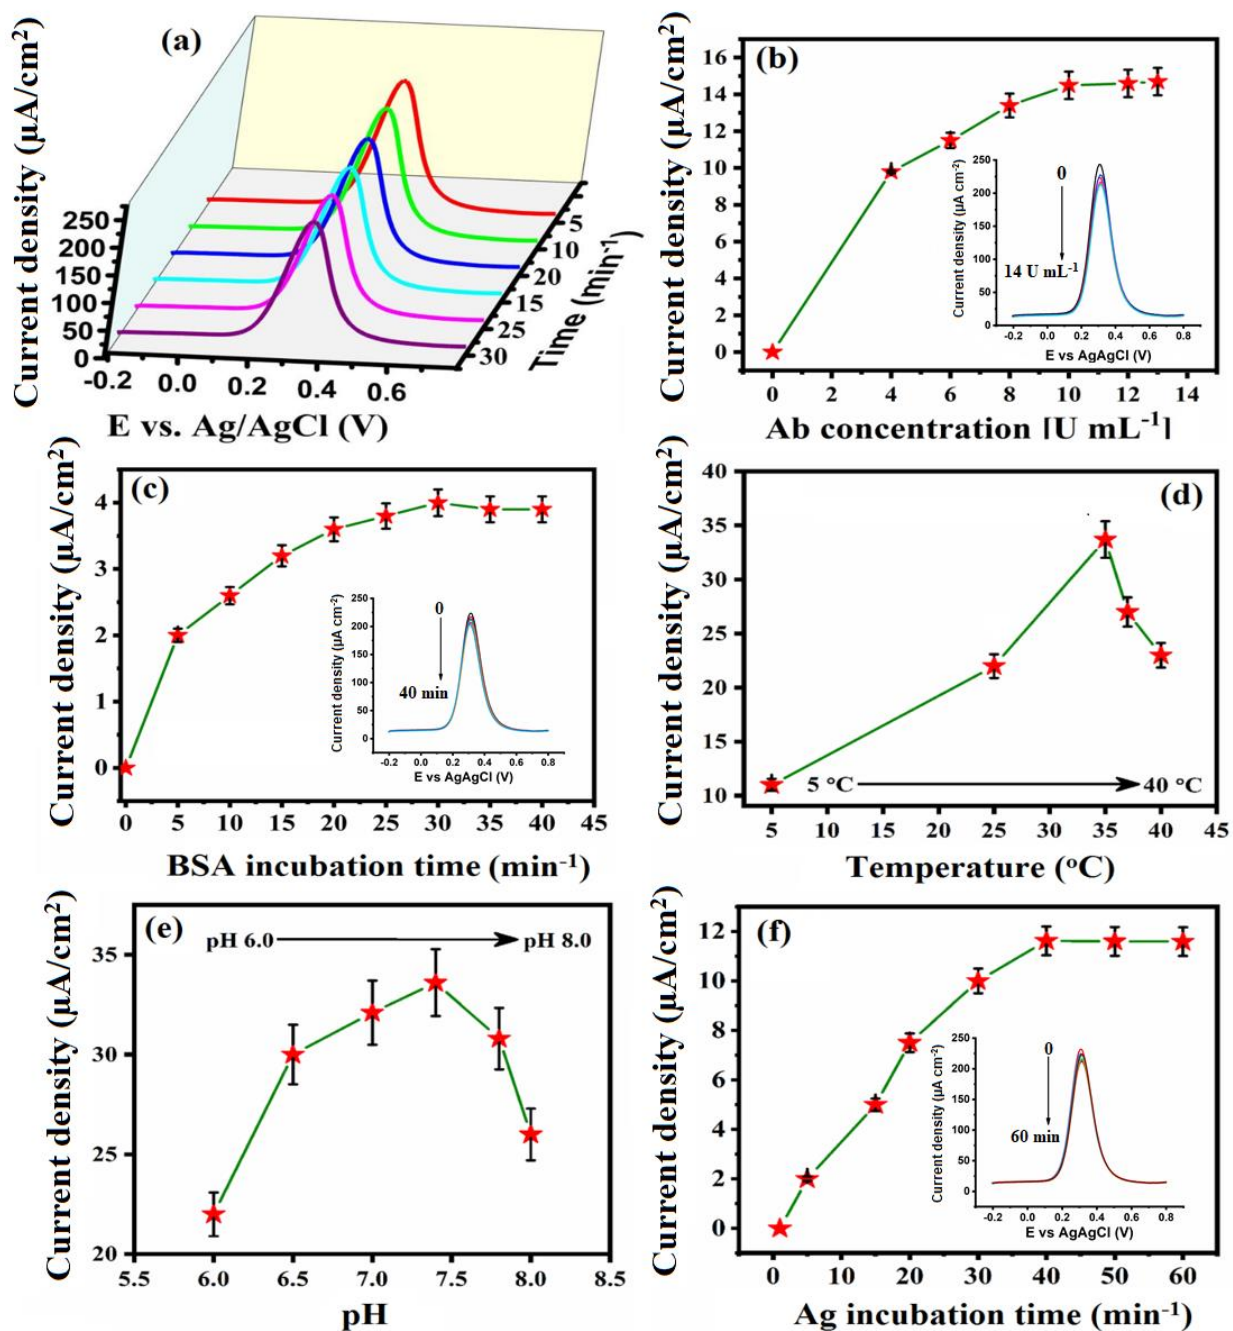

**Figure S4.** (a) Effect of incubation time, (b) Effect of the immobilization Ab concentration, (c) effect of BSA incubation time in the presence of  $10 \text{ U mL}^{-1}$ , (d) Incubation temperature, (e) effect of pH, and (f) incubation time of Ag. Inset corresponding SWV curve. All immunosensor signals respond to  $10 \text{ U mL}^{-1}$  CA125 in  $0.05 \text{ MPBS}$  containing  $5 \text{ mm} [\text{Fe}(\text{CN})_6]^{3-/4-}/0.1 \text{ M KCl}$ . Error bar = RSD ( $n=3$ ).

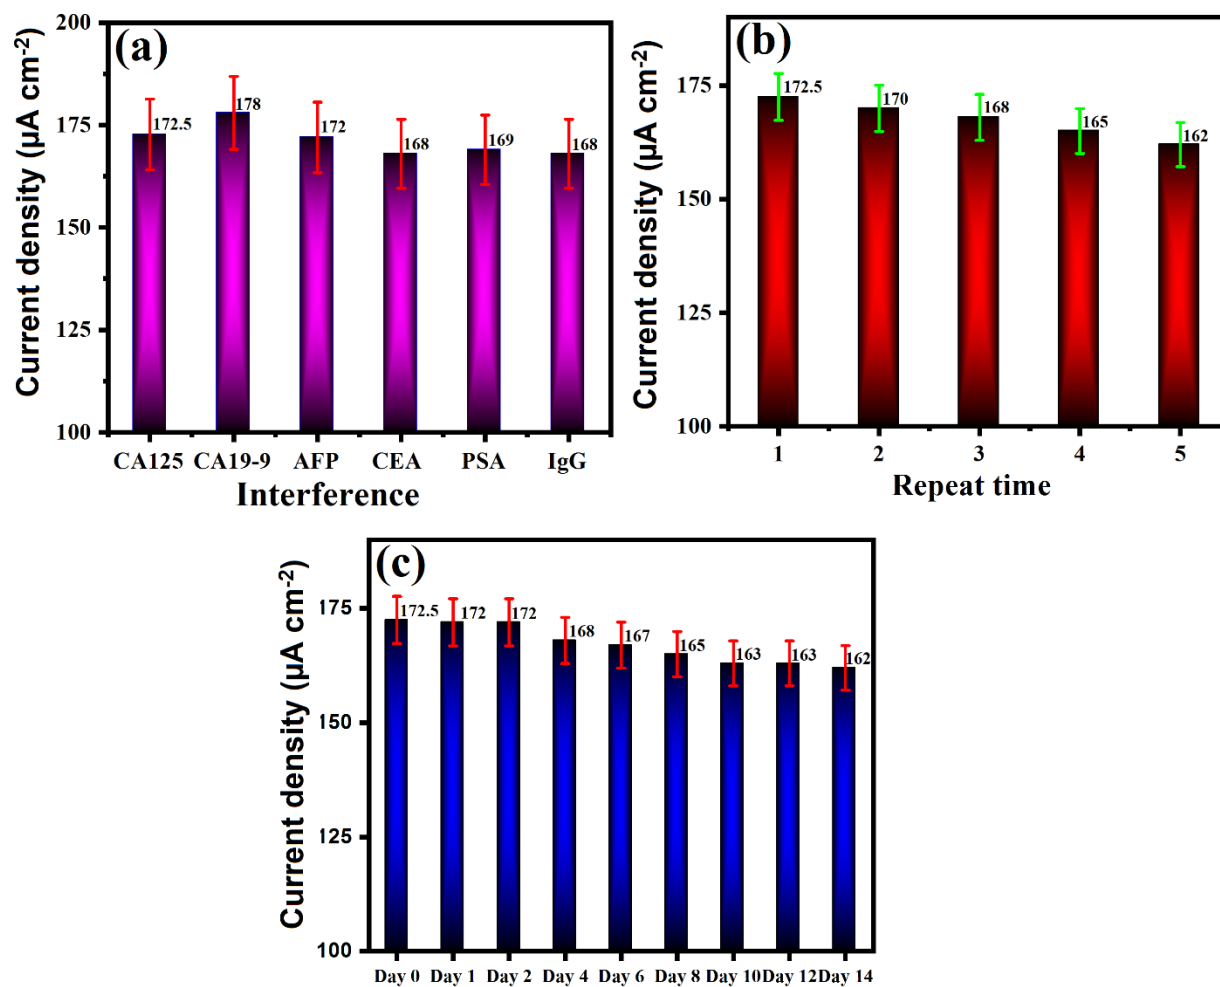

**Figure S5.** (a) Effect of interference, (b) effect of repeatability, (c) effect of storage stability, signal response of the immunosensor to 10 U mL<sup>-1</sup> CA125 in 0.1 PBS M (pH 7.4) solution containing in 5 mm [Fe(CN)<sub>6</sub>]<sup>3-/4-</sup>/0.1 M KCl. Error bar = RSD (n=3).



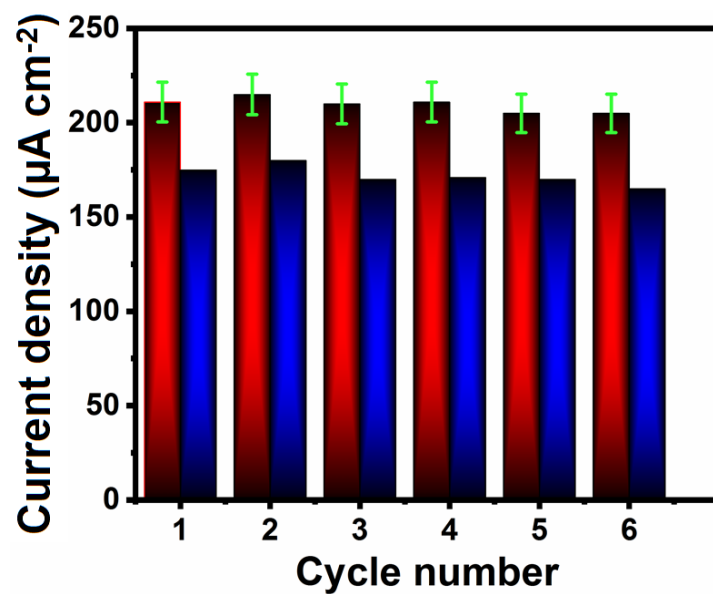

**Figure S6.** Effect of regeneration, signal response of the immunosensor to  $10 \text{ U mL}^{-1}$  CA125 in  $0.1 \text{ M PBS (pH 7.4)}$  solution is containing in  $5 \text{ mm } [\text{Fe}(\text{CN})_6]^{3-/4-}/0.1 \text{ M KCl}$ . Error bar = RSD ( $n=3$ ).

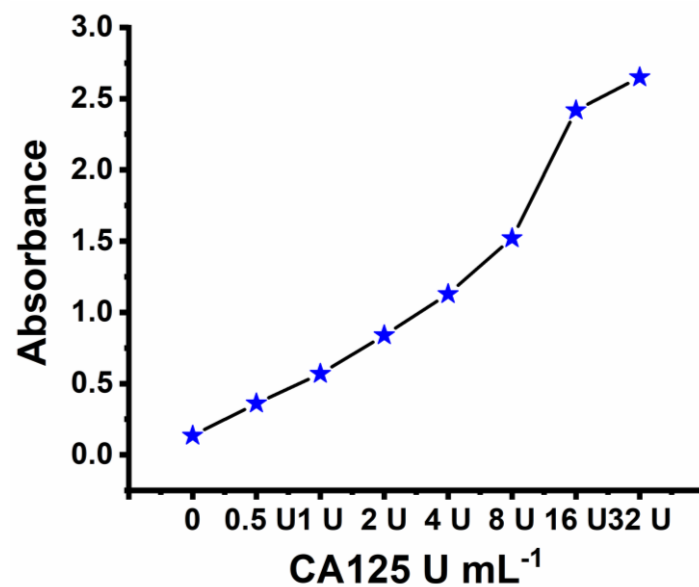

**Figure S7.** Standard inhibition curve for the indirect ELISA. Serum sample was 2-fold dilution

## References

**S1.** Li, Y.; Cui, R.; Huang, H.; Dong, J.; Liu, B.; Zhao, D.; Wang, J.; Wang, D.; Yuan, H.; Guo, X. High Performance Determination of  $\text{Pb}^{2+}$  in Water by 2, 4-Dithiobiuret-Reduced Graphene Oxide Composite with Wide Linear Range and Low Detection Limit. *Anal. Chim. Acta* **2020**.
